# Supplementary material for: Updated vaccine protects against SARS-CoV-2 variants including Omicron (B.1.1.529) and prevents transmission in hamsters
Source: PubMed Central journal article supplement (PMC9636174; doi:10.1038/s41467-022-34439-7), 2022-11-04
Supplement: 41467_2022_34439_MOESM1_ESM.pdf [file 41467_2022_34439_MOESM1_ESM.pdf]

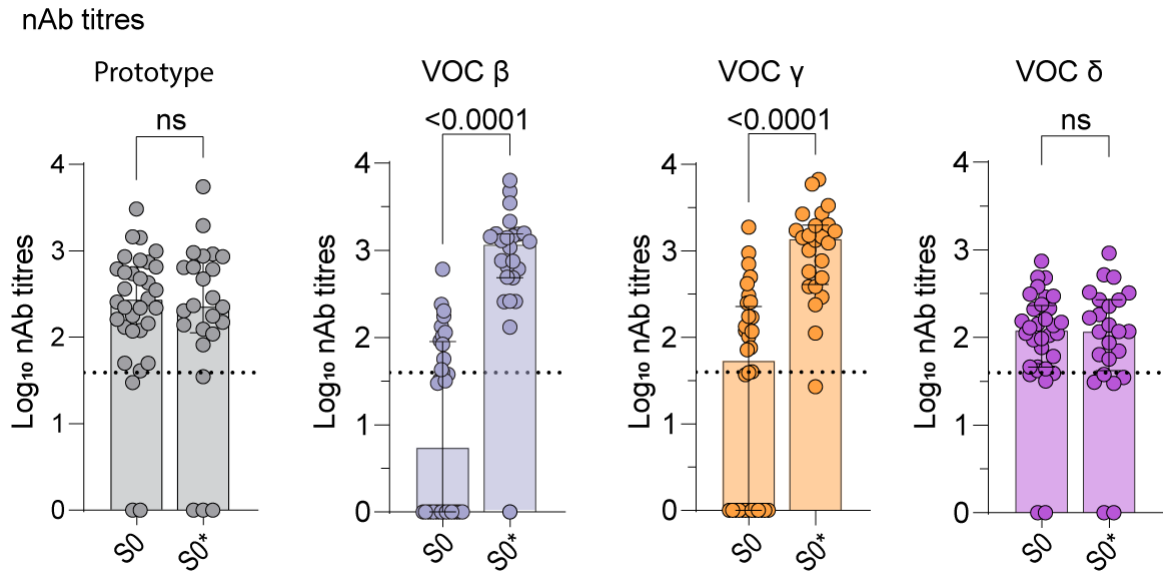

**Figure S1 (related to main Figure 2A, D). Comparison of the immunogenicity of S0 and S0\*.** NAb titres against prototypic (grey circles), VOC Beta (blue circles), VOC Gamma (orange circles) and VOC Delta (purple circles) spike pseudotyped virus on day 21 after vaccination with prototype YF-S0 ( $n=32$ ) and YF-S0\* ( $n=24$ ). Bar graphs denote median  $\pm$  IQR. Dotted line represents the lower limit of quantification. Differences between groups were analyzed using non-parametric two-tailed Mann-Whitney.

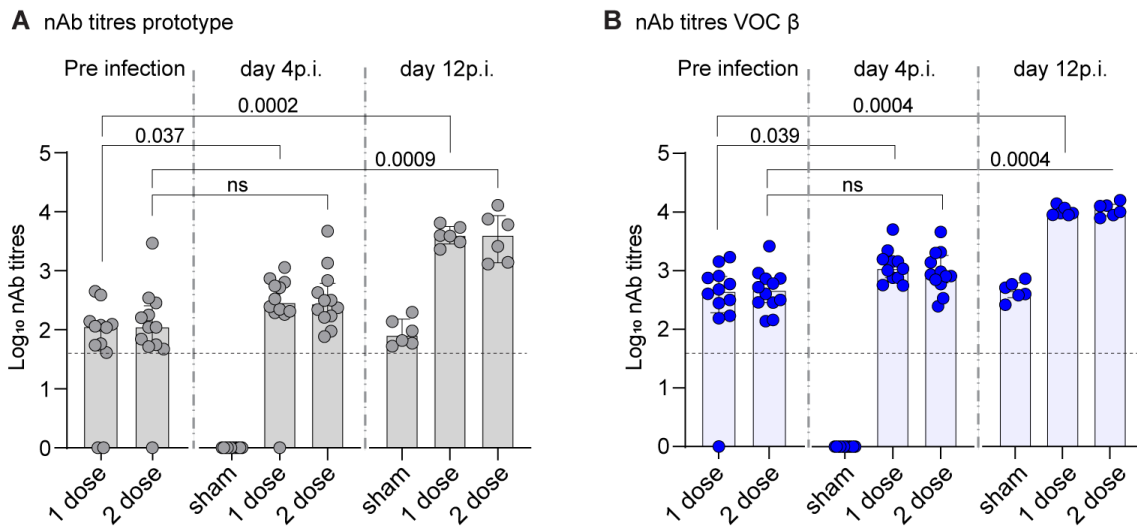

**Figure S2 (related to main Figure 3). Comparison of nAb levels pre and post challenge. A, B,** nAb titres against prototypic (grey circles) (A) and VOC Beta (blue circles) (B) spike pseudotyped virus on day 21 after vaccination with 1 ( $n=12$ ) or 2 doses ( $n=12$ ) of YF-S0\* (pre infection) and day 4 ( $n=24$  vaccinated and  $n=12$  sham vaccinated) or day 12 ( $n=12$  vaccinated and  $n=6$  sham vaccinated) after infection. Bar graphs denote median  $\pm$  IQR. Dashed line (horizontal) represents the lower limit of quantification. Pre infection nAb data have been reused from main Figure 3B. Differences between groups were analyzed using non-parametric Kruskal Wallis test uncorrected for ties.

**A** nAb titres YF-S0    **B** nAb titres YF-S0\*

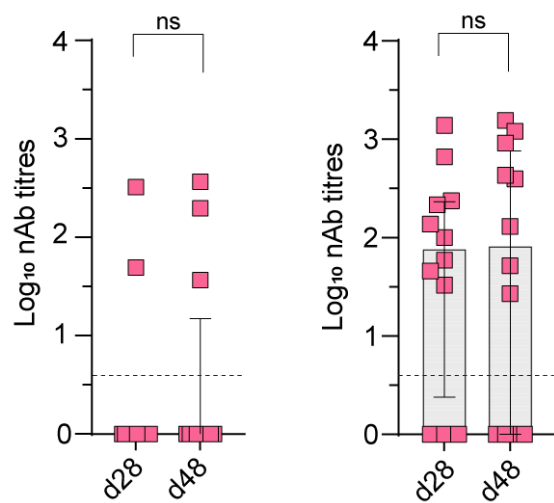

**Figure S3 (related to main Figure 4). Increased potency of vaccine candidate S0\* against VOC Omicron.** **A, B**, nAb titres against omicron spike pseudotyped virus (red squares) on day 28 and day 48 after vaccination with two doses (day 0 and day 7) of prototype YF-S0 ( $n=12$ ) (**A**) or YF-S0\* ( $n=12$ ) (**B**). Bar graphs denote median  $\pm$  IQR. Dashed line represents the lower limit of quantification. Differences between groups were analyzed using non-parametric two-tailed Mann-Whitney.
